# Supplementary material for: Mechanistic insights into Phage SSB-activated bacterial Retron-Eco8 immunity
Source: Research Square preprint supplement (doi:10.21203/rs.3.rs-8111978/v1), 2025-11-28
Supplement: Supplementary file 2 [file fa53460e37a7f95b3f5c1146.xlsx]

## Sheet: Figure 1c
		EV	Eco8
	Bas01	300000000	100000
	Bas04	20000000	20000000
	Bas05	40000000	20000000
	Bas06	100000000	200000000
	Bas13	50000000	30000000
	T1	10000000000	10000000000
	Bas14	1000000	1000
	Bas18	10000000	10000000
	Bas19	10000000000	10000000000
	Bas21	6000000000	100000
	Bas22	2000000000	10000
	Bas26	3000000000	1000000
	Bas28	4000000000	100000000
	Bas31	4000000000	100000000
	Bas32	10000000000	1000000
	Bas33	12000000000	10000000
	Bas34	10000000000	100000
	T5	20000000000	1000000000
	Bas35	20000000000	100000
	Bas36	1000000000	10000
	Bas37	600000000	10000
	Bas38	8000000000	100000
	Bas39	8000000000	100000
	T2	10000000	1000000
	T4	20000000000	1000000
	T6	8000000000	100000
	Bas47	6000000000	10000
	Bas48	12000000000	10000
	Bas49	7000000000	10000
	Bas50	1000000000	10000
	Bas63	10000000000	10000000
	Bas64	10000000000	100000
	Bas67	10000000000	1000000
	Bas68	100000000	100000
	Bas69	19000000000	10000000
	T7	10000000000	1000000

## Sheet: Figure 1d
		EV-T4(MOI=4)				EV-T4(MOI=0.5)				EV-T4(MOI=0.05)				EV-T4(MOI=0)				Eco8-T4(MOI=4)				Eco8-T4(MOI=0.5)				Eco8-T4(MOI=0.05)				Eco8-T4(MOI=0)
时间	T° 600	A1	A2	A3		D1	D2	D3		G1	G2	G3		H1	H2	H3		A4	A5	A6		D4	D5	D6		G4	G5	G6		H4	H5	H6
00:00:08	36.9	0.118	0.118	0.116		0.122	0.121	0.122		0.117	0.115	0.117		0.117	0.116	0.117		0.115	0.113	0.113		0.117	0.116	0.115		0.113	0.115	0.115		0.112	0.114	0.114
00:10:08	37	0.121	0.12	0.119		0.126	0.125	0.125		0.121	0.119	0.121		0.122	0.119	0.121		0.115	0.114	0.113		0.118	0.118	0.117		0.116	0.117	0.117		0.115	0.117	0.117
00:20:08	37	0.125	0.124	0.122		0.13	0.129	0.129		0.126	0.124	0.125		0.125	0.124	0.126		0.116	0.116	0.114		0.121	0.121	0.12		0.118	0.12	0.12		0.118	0.121	0.12
00:30:08	37.1	0.124	0.123	0.122		0.13	0.129	0.128		0.128	0.125	0.127		0.128	0.125	0.127		0.115	0.117	0.115		0.123	0.122	0.122		0.121	0.123	0.123		0.121	0.123	0.123
00:40:08	37	0.123	0.123	0.122		0.124	0.123	0.127		0.115	0.119	0.12		0.123	0.122	0.122		0.113	0.116	0.115		0.124	0.123	0.123		0.122	0.124	0.124		0.122	0.124	0.124
00:50:08	37	0.122	0.122	0.12		0.122	0.123	0.125		0.125	0.123	0.124		0.141	0.131	0.135		0.109	0.116	0.115		0.124	0.124	0.123		0.123	0.125	0.125		0.123	0.125	0.124
01:00:08	37	0.119	0.119	0.118		0.126	0.126	0.129		0.16	0.144	0.137		0.168	0.162	0.171		0.108	0.116	0.114		0.125	0.125	0.123		0.123	0.125	0.125		0.126	0.127	0.127
01:10:08	37	0.116	0.116	0.115		0.131	0.13	0.134		0.187	0.165	0.159		0.197	0.183	0.185		0.108	0.116	0.114		0.126	0.126	0.123		0.126	0.128	0.129		0.129	0.13	0.131
01:20:08	37	0.111	0.112	0.111		0.128	0.128	0.131		0.182	0.176	0.172		0.216	0.203	0.21		0.108	0.116	0.115		0.129	0.128	0.125		0.131	0.134	0.134		0.131	0.132	0.129
01:30:08	37	0.106	0.107	0.106		0.121	0.122	0.125		0.188	0.164	0.172		0.249	0.229	0.237		0.108	0.113	0.115		0.133	0.133	0.129		0.132	0.133	0.137		0.14	0.142	0.137
01:40:08	37.1	0.103	0.104	0.102		0.115	0.116	0.118		0.17	0.168	0.168		0.299	0.277	0.281		0.108	0.111	0.116		0.133	0.135	0.133		0.135	0.138	0.139		0.146	0.153	0.15
01:50:08	37	0.101	0.101	0.1		0.111	0.111	0.113		0.167	0.173	0.172		0.301	0.258	0.278		0.108	0.111	0.119		0.134	0.136	0.139		0.142	0.145	0.144		0.154	0.16	0.158
02:00:08	37	0.1	0.1	0.099		0.108	0.107	0.109		0.154	0.158	0.155		0.3	0.255	0.279		0.109	0.112	0.117		0.14	0.139	0.141		0.15	0.156	0.152		0.168	0.166	0.169
02:10:08	37	0.099	0.099	0.098		0.106	0.105	0.107		0.148	0.148	0.152		0.3	0.26	0.294		0.108	0.112	0.115		0.144	0.144	0.143		0.161	0.188	0.168		0.182	0.182	0.183
02:20:08	37	0.099	0.099	0.098		0.105	0.104	0.105		0.136	0.134	0.14		0.298	0.273	0.306		0.108	0.112	0.113		0.152	0.195	0.152		0.175	0.21	0.171		0.196	0.198	0.209
02:30:08	37	0.099	0.099	0.098		0.104	0.103	0.104		0.124	0.123	0.127		0.302	0.282	0.323		0.109	0.112	0.112		0.158	0.2	0.168		0.22	0.236	0.207		0.213	0.216	0.235
02:40:08	37	0.099	0.098	0.097		0.104	0.103	0.104		0.115	0.115	0.118		0.315	0.293	0.339		0.109	0.113	0.114		0.225	0.218	0.176		0.246	0.241	0.248		0.229	0.234	0.246
02:50:08	37	0.099	0.098	0.097		0.104	0.103	0.104		0.11	0.11	0.113		0.341	0.299	0.349		0.109	0.113	0.115		0.225	0.225	0.206		0.248	0.247	0.26		0.237	0.246	0.245
03:00:08	37	0.099	0.098	0.097		0.104	0.103	0.104		0.107	0.107	0.11		0.351	0.31	0.356		0.11	0.114	0.116		0.239	0.233	0.272		0.253	0.25	0.267		0.243	0.253	0.255
03:10:08	37	0.099	0.098	0.097		0.104	0.103	0.104		0.105	0.105	0.108		0.375	0.321	0.397		0.111	0.115	0.117		0.241	0.243	0.286		0.26	0.258	0.272		0.252	0.259	0.26
03:20:08	37.1	0.099	0.098	0.097		0.104	0.103	0.104		0.105	0.104	0.106		0.387	0.335	0.398		0.111	0.115	0.119		0.251	0.252	0.278		0.269	0.267	0.277		0.259	0.263	0.269
03:30:08	37	0.099	0.098	0.097		0.104	0.103	0.104		0.104	0.103	0.106		0.383	0.34	0.394		0.113	0.117	0.119		0.26	0.261	0.286		0.281	0.276	0.285		0.267	0.27	0.275
03:40:08	37	0.099	0.098	0.097		0.104	0.103	0.104		0.104	0.103	0.105		0.387	0.352	0.407		0.114	0.119	0.122		0.271	0.275	0.29		0.286	0.284	0.292		0.272	0.275	0.281
03:50:08	37	0.099	0.098	0.097		0.104	0.103	0.104		0.103	0.103	0.105		0.393	0.364	0.418		0.116	0.121	0.126		0.277	0.283	0.289		0.3	0.293	0.298		0.279	0.283	0.288
04:00:08	37	0.099	0.098	0.097		0.104	0.103	0.104		0.103	0.102	0.105		0.396	0.375	0.432		0.119	0.123	0.129		0.285	0.287	0.293		0.306	0.304	0.307		0.287	0.292	0.301
04:10:08	37	0.099	0.098	0.097		0.104	0.103	0.104		0.103	0.102	0.104		0.411	0.383	0.445		0.12	0.125	0.13		0.294	0.294	0.301		0.334	0.306	0.32		0.299	0.307	0.318
04:20:08	37.1	0.099	0.098	0.097		0.104	0.103	0.104		0.103	0.102	0.104		0.413	0.398	0.468		0.123	0.126	0.131		0.306	0.311	0.312		0.318	0.316	0.321		0.312	0.304	0.322
04:30:08	37	0.099	0.098	0.097		0.104	0.103	0.104		0.103	0.102	0.104		0.425	0.411	0.483		0.124	0.126	0.13		0.322	0.318	0.32		0.32	0.313	0.322		0.307	0.303	0.321
04:40:08	36.9	0.099	0.098	0.097		0.104	0.103	0.104		0.103	0.102	0.104		0.442	0.424	0.494		0.126	0.126	0.129		0.324	0.32	0.327		0.32	0.31	0.321		0.304	0.301	0.328
04:50:08	37	0.099	0.098	0.097		0.104	0.103	0.104		0.103	0.102	0.104		0.457	0.43	0.511		0.126	0.126	0.127		0.325	0.318	0.327		0.324	0.313	0.327		0.308	0.305	0.333
05:00:08	37	0.099	0.098	0.097		0.104	0.103	0.104		0.103	0.102	0.104		0.462	0.434	0.525		0.125	0.124	0.127		0.326	0.32	0.324		0.33	0.319	0.332		0.313	0.311	0.338
05:10:08	37	0.099	0.098	0.097		0.104	0.103	0.104		0.103	0.102	0.104		0.489	0.436	0.539		0.124	0.124	0.126		0.328	0.321	0.325		0.334	0.324	0.335		0.317	0.316	0.349
05:20:08	37	0.099	0.098	0.097		0.104	0.103	0.105		0.103	0.102	0.104		0.503	0.434	0.555		0.123	0.124	0.126		0.33	0.325	0.329		0.337	0.327	0.336		0.325	0.324	0.358
05:30:08	37	0.099	0.098	0.097		0.104	0.103	0.104		0.103	0.102	0.104		0.518	0.437	0.565		0.123	0.123	0.125		0.334	0.329	0.331		0.339	0.332	0.34		0.327	0.33	0.365
05:40:08	37	0.099	0.098	0.097		0.103	0.103	0.104		0.103	0.102	0.104		0.53	0.434	0.579		0.122	0.123	0.125		0.342	0.333	0.338		0.343	0.337	0.347		0.338	0.342	0.378
05:50:08	37	0.099	0.098	0.097		0.104	0.103	0.104		0.103	0.102	0.104		0.535	0.433	0.589		0.122	0.122	0.124		0.343	0.332	0.338		0.349	0.344	0.355		0.347	0.351	0.387
06:00:08	37	0.099	0.098	0.097		0.104	0.103	0.105		0.103	0.102	0.104		0.529	0.425	0.605		0.123	0.121	0.123		0.348	0.338	0.341		0.362	0.355	0.367		0.362	0.364	0.398
06:10:08	37	0.099	0.098	0.097		0.104	0.103	0.104		0.103	0.102	0.104		0.54	0.419	0.615		0.123	0.12	0.121		0.358	0.346	0.349		0.372	0.364	0.38		0.373	0.374	0.407

## Sheet: Figure 1e
		replicate1	replicate2	replicate3
	EV	90000000000	80000000000	40000000000
	Retron-Eco8	1000000	1000000	1000000
	RT*	60000000000	60000000000	40000000000
	ncRNA*	80000000000	60000000000	70000000000
	Toprim*	50000000000	70000000000	70000000000
	ATPase*	40000000000	50000000000	80000000000

## Sheet: Figure 4f
		replicate1			replicate2			replicate3
		INDUCTION	NO INDUCTION		INDUCTION	NO INDUCTION		INDUCTION	NO INDUCTION
	E8+EV	300000000	3000000000		110000000	500000000		80000000	800000000
	EV+SSB	100000000	4000000000		200000000	500000000		100000000	300000000
	E8+SSB	30000	2000000000		100	3000000000		300	1000000000
	E8+Δobflod	200000000	3000000000		70000000	1000000000		60000000	700000000
	E8+Δc-tail	10000	3000000000		600	3000000000		1000	1000000000
	E8+Y158A	300000000	1000000000		300000000	700000000		80000000	2000000000

## Sheet: Figure 6f
		replicate1			replicate2			replicate3
		INDUCTION	NO INDUCTION		INDUCTION	NO INDUCTION		INDUCTION	NO INDUCTION
	E8+EV	200000000	1000000000		200000000	600000000		300000000	1200000000
	EV+SSB	300000000	1000000000		200000000	100000000		100000000	1800000000
	E8+SSB	40000	3000000000		100000	500000000		30000	1000000000
	SL1-1+EV	200000000	3000000000		200000000	300000000		800000000	1000000000
	SL1-1	30000000	3000000000		100000000	1000000000		60000000	1000000000
	SL2-1+EV	300000000	3000000000		100000000	500000000		200000000	4000000000
	SL2-1	6000000	2000000000		1000000	1000000000		3000000	2000000000
	SL1-2+EV	200000000	3000000000		100000000	500000000		160000000	500000000
	SL1-2	20000000	1000000000		100000000	3000000000		40000000	3000000000
	SL2-2+EV	200000000	1000000000		300000000	2000000000		30000000	400000000
	SL2-2	120000000	2000000000		120000000	1000000000		40000000	6000000000
	SL1+2+EV	300000000	3000000000		200000000	400000000		200000000	1000000000
	SL1+2	180000000	700000000		100000000	1000000000		100000000	9000000000

## Sheet: Extended Data Fig 1
			MOI	0		2		15		30		60	min
		EV	0	10000000000		10000000000		1000000000		30000000000		4000000000
				10000000000		4000000000		2000000000		10000000000		10000000000
				1000000000		3000000000		1000000000		2000000000		10000000000
			0.5			500000000		70000000		3000		1000
						200000000		100000000		3000		1000
						200000000		20000000		4000		3000
			5			30000		20000		10000		10000
						20000		20000		10000		10000
						10000		40000		10000		10000
			10			10000		10000		20000		20000
						10000		10000		60000		50000
						10000		30000		10000		20000
		Eco8	0	1000000000		2000000000		10000000000		2000000000		3000000000
				1600000000		2000000000		3000000000		2000000000		1000000000
				1000000000		800000000		10000000000		1400000000		20000000000
			0.5			400000000		100000000		50000000		200000000
						100000000		20000000		1000000000		200000000
						200000000		100000000		100000000		400000000
			5			10000		20000		20000		40000
						10000		20000		20000		30000
						10000		10000		40000		20000
			10			20000		10000		20000		40000
						10000		10000		20000		50000
						20000		30000		30000		70000

## Sheet: Extended Data Fig 5a
		NC			Azaca			T7-SSB			Eco8			Eco8(ecoli-genome)			Eco8-T7-SSB			Eco8-T7-SSB(ecoli-genome)
时间	T° 630	A1	A2	A3	B1	B2	B3	C1	C2	C3	D1	D2	D3	E1	E2	E3	F1	F2	F3	G1	G2	G3
00:26:00	31.3	0.443	0.409	0.397	0.771	0.788	0.791	0.31	0.279	0.293	0.436	0.398	0.391	0.357	0.335	0.292	0.241	0.222	0.242	0.238	0.233	0.229
				A7	B7	C7	D7	E7	F7	G7	H7
				0.106	0.127	0.132	0.173	0.225	0.348	0.649	1.96
				0	15.625	31.25	62.5	125	250	500	2000		nmol
